# Supplementary material for: Highly Stable, Mechanically Enhanced, and Easy-to-Collect Sodium Alginate/NZVI-rGO Gel Beads for Efficient Removal of Cr(VI)
Source: MDPI journal article supplement (doi:10.3390/polym15183764), 2023-09-14
Supplement: s1 [file s1]

# Highly Stable, Mechanically Enhanced, and Easy-to-Collect Sodium Alginate/NZVI-rGO Gel Beads for Efficient Removal of Cr(VI)

Qi Jing \*, Yuheng Ma, Jingwen He and Zhongyu Ren

Faculty of Architecture, Civil and Transportation Engineering, Beijing University of Technology,  
Beijing 100124, China

\* Correspondence: jingqi@bjut.edu.cn; Tel.: +86-185-0195-00178

## Text S1. Swelling ratio and water content

The swelling ratio (SR%) was determined by immersing the dried SA/NZVI-rGO beads in aqueous solutions of different pH at room temperature until reaching equilibrium and the SR was calculated using Eq. (S1).

$$SR = \frac{W_s - W_d}{W_d} \quad (S1)$$

where  $W_s$  is the bead weights after swelling and  $W_d$  is the bead weights in the dry state.

The water content (WC%) of SA/NZVI-rGO hydrogel beads was calculated by weighing them after freeze-drying using Eq. (S2).

$$WC = \frac{W_0 - W_d}{W_0} \times 100\% \quad (S2)$$

where  $W_0$  is the wet bead weights and  $W_d$  is the dry bead weights.

## Text S2. The calculation of removal capacity and removal efficiency

The removal capacity (mg/g) was calculated using Eq. (S3).

$$q_t = (C_0 - C_t) \frac{V}{m} \quad (S3)$$

where  $C_0$  and  $C_t$  are the initial concentration and the concentration after a period  $t$  (mg/L), respectively;  $V$  is the initial solution volume (L); and  $m$  is the adsorbent dosage (g).

The removal efficiency of Cr(VI) is calculated by Eq. (S4).

$$Removal(\%) = \frac{(C_0 - C_t)}{C_0} \times 100 \quad (S4)$$

where  $C_0$  and  $C_t$  are the initial concentration and the concentration after a period  $t$  (mg/L), respectively.

## Text S3. Reusability of SA/NZVI-rGO gel beads

Adsorbents that can be easily recovered decrease the risk of secondary pollution to the environment, and the recovery and reuse of adsorbents are important factors in

---

reducing costs and increasing efficiency. Therefore, the SA/NZVI-rGO beads were desorbed by shaking in a water-bath thermostatic oscillator for 1 h with 0.01 M HCl solution and washed several times with deionized water to remove the surface H<sup>+</sup>. The treated gel beads were re-applied and the operation was repeated several times. Fig S5 shows that the removal efficiency and removal capacity could reach 87.73 % and 3.59 mg/g for the second use, but the removal efficiency decreased to 53.27% and 28.08% for the third and fourth use, respectively, which could be attributed to the repeated oxidation reaction of the gel beads with the highly oxidizing Cr (VI) breaking the polymer chains and thus leading to the reduction of the active sites (Sarojini et al., 2021). SA/NZVI-rGO beads could be effectively utilized three times.

**Text S4. Theoretical column models of Thomas model, Adam-Bohart model and Yoon-Nelson model**

Thomas model supposes that a flat push flow effect in the fixed bed removal process (Thomas, 1948), and the model equation is explained by Eq. (S5) below.

$$\frac{C_t}{C_0} = \frac{1}{1 + \exp\left(K_T q_0 \frac{m}{Q} - K_T C_0 t\right)} \quad (\text{S5})$$

where  $C_0$  is the influent concentration (mg/L),  $C_t$  is the effluent concentration (mg/L),  $K_T$  is the Thomas model constant (L/mg/min),  $q_0$  is the maximum removal capacity (mg/g),  $m$  is the gel beads mass in the column (g) and  $Q$  is the flow rate (L/min).

Adam-Bohart model was derived from surface theory which provides the dynamic relationship between  $C_t/C_0$  in column mode, the model can predict the relationship between bed depth and breakthrough occurrence time (Bohart and Adams, 1920), and the model can be expressed using Eq. (S6).

$$\frac{C_t}{C_0} = \frac{1}{1 + \exp(K_{AB} N_0 \frac{h}{v} - K_{AB} C_0 t)} \quad (\text{S6})$$

where  $C_0$  is the influent concentration (mg/L),  $C_t$  is the effluent concentration (mg/L),  $K_{AB}$  is the kinetic constant (L/mg/min),  $N_0$  is the saturation concentration (mg/L),  $h$  is the bed depth (cm), and  $v$  is the linear velocity (cm/min) calculated by dividing the flow rate of the column by the cross-sectional area.

Yoon-Nelson model is a semi-empirical model, which is fitted without considering the flow rate and adsorbent dosage, requiring fewer known parameters in a simple form (Yoon and Nelson, 1984). The model is expressed by the following Eq. (S7).

$$\frac{C_t}{C_0} = \frac{1}{1 + \exp(K_Y t - \tau K_Y)} \quad (\text{S7})$$

where  $K_Y$  is rate constant (min<sup>-1</sup>),  $\tau$  is the time required for 50% removal breakthrough (min).

**Table S1.** Comparison of the removal efficiency of Cr(VI) by NZVI-based materials under alkaline conditions.

| Adsorbent  | pH range | Minimum removal efficiency (%) | Reference           |
|------------|----------|--------------------------------|---------------------|
| P-BC/nZVI  | 2-11     | 62.82                          | (Yi et al., 2023)   |
| C-nZVI@BC  | 2-8      | 35.22                          | (Wang et al., 2023) |
| S-nZVI@H   | 4-8      | 34.2                           | (Tian et al., 2023) |
| Fe@LDH/rGO | 3-11     | 29.8                           | (Lv et al., 2019)   |

|                          |          |      |                         |
|--------------------------|----------|------|-------------------------|
| nZVI/graphene composites | 2-12     | 24   | (Phyu Mon et al., 2023) |
| nZVI@LH                  | 2.1-10.1 | 18.5 | (Liu et al., 2022)      |
| SA/NZVI-rGO gel beads    | 3-11     | 82.1 | Present study           |

**Table S2.** Composition of the actual Cr(VI) wastewater before and after treatment.

| Composition                   | Before treatment (mg/L) | After treatment (mg/L) |
|-------------------------------|-------------------------|------------------------|
| Cr(VI)                        | 13.75                   | 4.09                   |
| Cl <sup>-</sup>               | 1462.9512               | 1091.7250              |
| NO <sub>3</sub> <sup>-</sup>  | 48.8570                 | 40.3813                |
| SO <sub>4</sub> <sup>2-</sup> | 13.7516                 | 28.0062                |
| PO <sub>4</sub> <sup>3-</sup> | 51.2167                 | 45.1446                |
| Ca <sup>2+</sup>              | 110.084                 | 191.8199               |
| Cu <sup>2+</sup>              | 0.0013                  | 0.0009                 |
| K <sup>+</sup>                | 314.3645                | 300.0982               |
| Mg <sup>2+</sup>              | 29.8242                 | 24.4651                |
| Na <sup>+</sup>               | 588.8296                | 627.5543               |
| Zn <sup>2+</sup>              | 0.0011                  | 0.0026                 |

**Table S3.** Comparison of maximum adsorption capacity of Cr(VI) by NZVI-based materials.

| Adsorbent                          | Removal capacity (mg/g) | Reference            |
|------------------------------------|-------------------------|----------------------|
| Cit-nZVI@BC                        | 99.73                   | (Zhou et al., 2022)  |
| AVT-nZVI                           | 59.17                   | (Zhao et al., 2019)  |
| P-BC/nZVI composite                | 54.8                    | (Yi et al., 2023)    |
| NZVI/carbon/alginate composite gel | 35.25                   | (Wen et al., 2020)   |
| CaCO <sub>3</sub> -nZVI            | 31.76                   | (Cheng et al., 2021) |
| Fe-SA-C900 hydrogel                | 27.9                    | (Zhao et al., 2021)  |
| S-nZVI@H                           | 9.24                    | (Tian et al., 2023)  |
| SA/NZVI-rGO gel beads              | 55.42                   | Present study        |

**Table S4.** Effect of bed height on column adsorption model constants.

| Bed height (cm) | Thomas                                           |                       |                | Adam-Bohart                                       |                       |                | Yoon-Nelson                                                 |         |                |
|-----------------|--------------------------------------------------|-----------------------|----------------|---------------------------------------------------|-----------------------|----------------|-------------------------------------------------------------|---------|----------------|
|                 | K <sub>T</sub> (L/mg/min)<br>(10 <sup>-3</sup> ) | q <sub>0</sub> (mg/g) | R <sup>2</sup> | K <sub>AB</sub> (L/mg/min)<br>(10 <sup>-3</sup> ) | N <sub>0</sub> (mg/L) | R <sup>2</sup> | K <sub>YN</sub> (min <sup>-1</sup> )<br>(10 <sup>-3</sup> ) | τ (min) | R <sup>2</sup> |
| 4.5             | 0.178                                            | 2.558                 | 0.925          | 0.178                                             | 138.537               | 0.925          | -1.81                                                       | 230     | 0.887          |
| 6.5             | 0.141                                            | 5.798                 | 0.974          | 0.415                                             | 307.944               | 0.974          | -1.42                                                       | 1134    | 0.974          |
| 8.5             | 0.977                                            | 7.484                 | 0.942          | 0.974                                             | 396.644               | 0.942          | -1.03                                                       | 1582    | 0.919          |

**Table S5.** Effect of initial concentration on column adsorption model constants.

| influent concentration (mg/L) | Thomas                                           |                       |                | Adam-Bohart                                       |                       |                | Yoon-Nelson                                                 |         |                |
|-------------------------------|--------------------------------------------------|-----------------------|----------------|---------------------------------------------------|-----------------------|----------------|-------------------------------------------------------------|---------|----------------|
|                               | K <sub>T</sub> (L/mg/min)<br>(10 <sup>-3</sup> ) | q <sub>0</sub> (mg/g) | R <sup>2</sup> | K <sub>AB</sub> (L/mg/min)<br>(10 <sup>-3</sup> ) | N <sub>0</sub> (mg/L) | R <sup>2</sup> | K <sub>YN</sub> (min <sup>-1</sup> )<br>(10 <sup>-3</sup> ) | τ (min) | R <sup>2</sup> |
| 10                            | 0.977                                            | 7.484                 | 0.942          | 0.977                                             | 396.653               | 0.942          | -1.03                                                       | 1582    | 0.919          |
| 30                            | 0.479                                            | 10.655                | 0.913          | 0.479                                             | 567.720               | 0.913          | -1.46                                                       | 605     | 0.827          |
| 40                            | 0.431                                            | 9.715                 | 0.933          | 0.431                                             | 514.909               | 0.933          | -1.74                                                       | 323     | 0.823          |

**Table S6.** Effect of flow rate on column adsorption model constants.

| Flow rate (ml/min) | Thomas                                           |                       |                | Adam-Bohart                                       |                       |                | Yoon-Nelson                                                 |         |                |
|--------------------|--------------------------------------------------|-----------------------|----------------|---------------------------------------------------|-----------------------|----------------|-------------------------------------------------------------|---------|----------------|
|                    | K <sub>T</sub> (L/mg/min)<br>(10 <sup>-3</sup> ) | q <sub>0</sub> (mg/g) | R <sup>2</sup> | K <sub>AB</sub> (L/mg/min)<br>(10 <sup>-3</sup> ) | N <sub>0</sub> (mg/L) | R <sup>2</sup> | K <sub>YN</sub> (min <sup>-1</sup> )<br>(10 <sup>-3</sup> ) | τ (min) | R <sup>2</sup> |

|     |       |       |       |       |         |       |       |       |       |
|-----|-------|-------|-------|-------|---------|-------|-------|-------|-------|
| 0.7 | 0.186 | 2.400 | 0.925 | 0.178 | 138.537 | 0.925 | -1.94 | 230   | 0.888 |
| 2   | 0.41  | 0.370 | 0.905 | 0.410 | 20.257  | 0.905 | -4.10 | 16.13 | 0.905 |
| 4   | 0.428 | 0.571 | 0.827 | 0.478 | 27.811  | 0.836 | -4.77 | 11.12 | 0.836 |

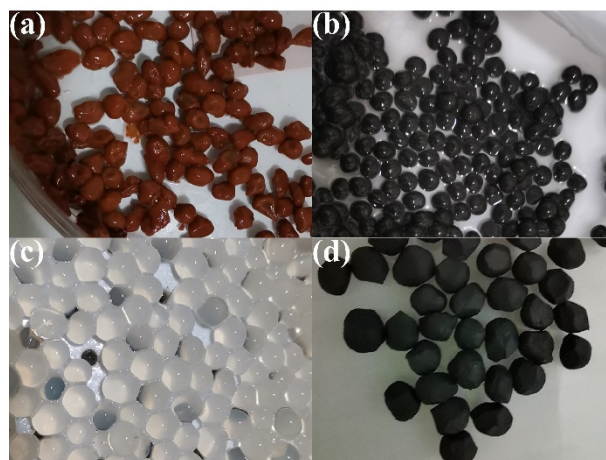

**Figure S1.** Photographs of (a) SA/NZVI beads and (b) SA/NZVI-rGO beads stored under seal for 226 days; Photographs of (c) SA beads and (d) freeze-dried SA/NZVI-rGO beads.

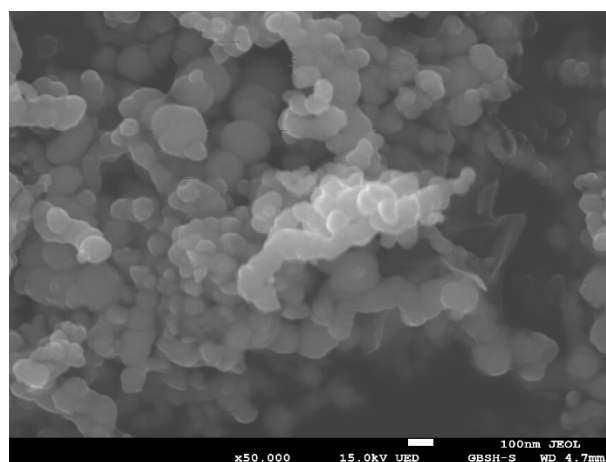

**Figure S2.** SEM of NZVI.

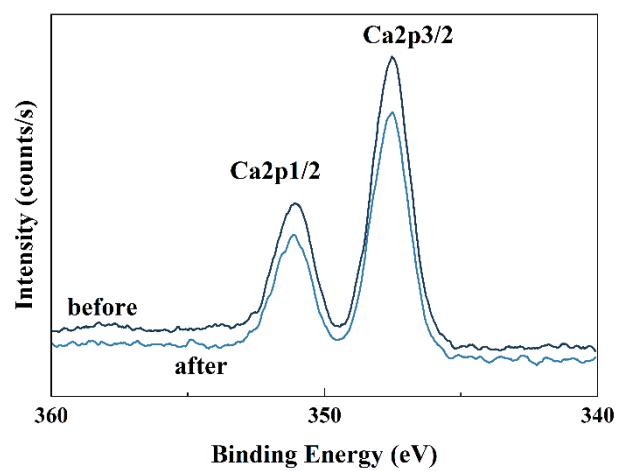

**Figure S3.** Ca 2p XPS spectra of SA/NZVI-rGO beads before and after removal Cr(VI).

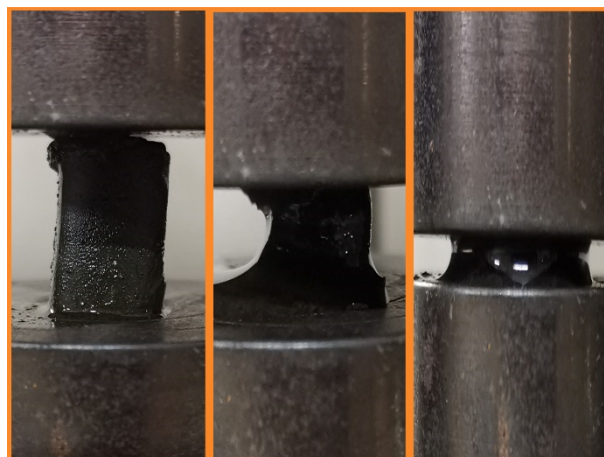

**Figure S4.** Photographs of hydrogels before, during, and after compression.

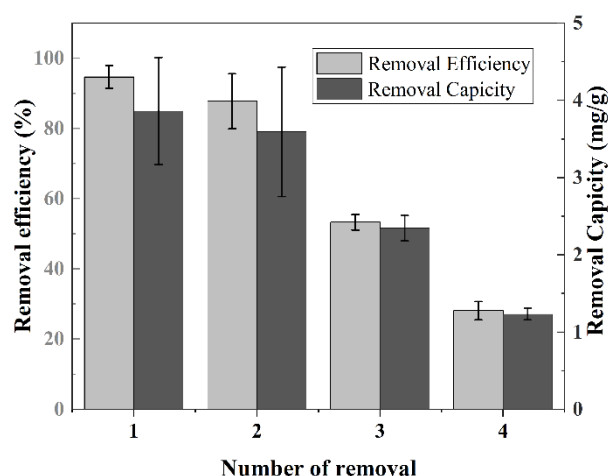

**Figure S5.** The reuse of SA/NZVI-rGO gel beads (initial concentration 20mg/L, pH3, dosage 0.5g, 298K).

## References

1. Bohart, G.S., Adams, E.Q., 1920. SOME ASPECTS OF THE BEHAVIOR OF CHARCOAL WITH RESPECT TO CHLORINE.1. J. Am. Chem. Soc. 42, 523–544. <https://doi.org/10.1021/ja01448a018>
2. Cheng, Y., Dong, H., Hao, T., 2021. CaCO<sub>3</sub> coated nanoscale zero-valent iron (nZVI) for the removal of chromium(VI) in aqueous solution. Sep. Purif. Technol. 257, 117967. <https://doi.org/10.1016/j.seppur.2020.117967>
3. Liu, X., Zhang, S., Zhang, X., Guo, H., Cao, X., Lou, Z., Zhang, W., Wang, C., 2022. A novel lignin hydrogel supported nZVI for efficient removal of Cr(VI). Chemosphere 301, 134781. <https://doi.org/10.1016/j.chemosphere.2022.134781>
4. Lv, X., Qin, X., Wang, K., Peng, Y., Wang, P., Jiang, G., 2019. Nanoscale zero valent iron supported on MgAl-LDH-decorated reduced graphene oxide: Enhanced performance in Cr(VI) removal, mechanism and regeneration. J. Hazard. Mater. 373, 176–186. <https://doi.org/10.1016/j.jhazmat.2019.03.091>
5. Phyu Mon, P., Phyu Cho, P., Chanadana, L., Ashok Kumar, K.V., Dobhal, S., Shashidhar, T., Madras, G., Subrahmanyam, Ch., 2023. Bio-waste assisted phase transformation of Fe<sub>3</sub>O<sub>4</sub>/carbon to nZVI/graphene composites and its application in reductive elimination of Cr(VI) removal from aquifer. Sep. Purif. Technol. 306, 122632. <https://doi.org/10.1016/j.seppur.2022.122632>
6. Sarojini, G., Venkatesh Babu, S., Rajamohan, N., Senthil Kumar, P., Rajasimman, M., 2021. Surface modified polymer-magnetic-algae nanocomposite for the removal of chromium- equilibrium and mechanism studies. Environ. Res. 201, 111626. <https://doi.org/10.1016/j.envres.2021.111626>
7. Tian, Z., Jing, Q., Qiao, S., You, W., 2023. Encapsulation/capture of S-nZVI particles by PANa-PAM hydrogel limits their leakage and improves Cr(VI) removal. Process Saf. Environ. Prot. 172, 124–135. <https://doi.org/10.1016/j.psep.2023.01.068>
8. Wang, T., Sun, Y., Bai, L., Han, C., Sun, X., 2023. Ultrafast removal of Cr(VI) by chitosan coated biochar-supported nano zero-valent iron aerogel from aqueous solution: Application performance and reaction mechanism. Sep. Purif. Technol. 306, 122631. <https://doi.org/10.1016/j.seppur.2022.122631>
9. Wen, R., Tu, B., Guo, X., Hao, X., Wu, X., Tao, H., 2020. An ion release controlled Cr(VI) treatment agent: Nano zero-valent iron/carbon/alginate composite gel. Int. J. Biol. Macromol. 146, 692–704. <https://doi.org/10.1016/j.ijbiomac.2019.12.168>

- 
10. Yi, Y., Wang, X., Zhang, Y., Yang, K., Ma, J., Ning, P., 2023. Formation and mechanism of nanoscale zerovalent iron supported by phosphoric acid modified biochar for highly efficient removal of Cr(VI). *Adv. Powder Technol.* 34, 103826. <https://doi.org/10.1016/j.appt.2022.103826>
  11. Yoon, Y.H., Nelson, J.H., 1984. Application of gas adsorption kinetics. I. A theoretical model for respirator cartridge service life. *Am. Ind. Hyg. Assoc. J.* 45, 509–516. <https://doi.org/10.1080/15298668491400197>
  12. Zhao, C., Hu, L., Zhang, C., Wang, S., Wang, X., Huo, Z., 2021. Preparation of biochar-interpenetrated iron-alginate hydrogel as a pH-independent sorbent for removal of Cr(VI) and Pb(II). *Environ. Pollut.* 287, 117303. <https://doi.org/10.1016/j.envpol.2021.117303>
  13. Zhao, R., Zhou, Z., Zhao, X., Jing, G., 2019. Enhanced Cr(VI) removal from simulated electroplating rinse wastewater by amino-functionalized vermiculite-supported nanoscale zero-valent iron. *Chemosphere* 218, 458–467. <https://doi.org/10.1016/j.chemosphere.2018.11.118>
  14. Zhou, H., Ma, M., Zhao, Y., Baig, S.A., Hu, S., Ye, M., Wang, J., 2022. Integrated green complexing agent and biochar modified nano zero-valent iron for hexavalent chromium removal: A characterisation and performance study. *Sci. Total Environ.* 834, 155080. <https://doi.org/10.1016/j.scitotenv.2022.155080>
